# Supplementary material
Source: publisher figshare collection journal article supplement (https://acs.figshare.com/ndownloader/files/24711632)

# Supporting Information

## Effect and Mechanism of Aluminum(III) for Guaiacol-Glyoxylic acid Condensation Reaction in Vanillin Production

*Haifang Mao<sup>1</sup>, Chiyuan Zhang<sup>1</sup>, Tao Meng<sup>1</sup>, Hongzhao Wang<sup>1</sup>, Xiaojun Hu<sup>1\*</sup>, Zuobing Xiao<sup>2</sup>, Chaoyang Wang<sup>1</sup>, Jibo Liu<sup>1\*</sup>*

---

<sup>1</sup> School of Chemical and Environmental Engineering, Shanghai Institute of Technology, 100 Haiquan Road, Shanghai, 201418, China

<sup>2</sup> School of Perfume and Aroma Technology, Shanghai Institute of Technology, 100 Haiquan Road, 201418, Shanghai, China.

## **Experiment Section:**

**The influence factor optimizes for the condensation conditions:**

- 1 The influence of pH value for the reaction**
- 2 The influence of molar ratio of guaiacol and glyoxylic acid for the reaction**
- 3 The influence of reaction time for the reaction**
- 4 The influence of reaction temperature for the reaction**

### **1. The influence of pH value for the reaction**

It has been previously demonstrated that the pH of the reaction solution is crucial to inhibit the disproportionation reaction of glyoxylic acid. Therefore, the effect of pH on product selectivity was first studied at room temperature (20 °C), reaction time of 40 h and the molar ratio of guaiacol to glyoxylic acid of 1.2:1. The optimum conditions were determined as pH=11.5 by comprehensive raw material conversion and product selectivity.

### **2. The influence of molar ratio of guaiacol and glyoxylic acid for the reaction**

Different molar ratio of guaiacol to glyoxylic acid will lead to different product selectivity. When the molar ratio of glyoxylic acid is greater than that of guaiacol, the selectivity of di-VMA will be the greatest. Therefore, the effect of molar ratio on the selectivity of target product was explored at room temperature (20 °C), pH=11.5, reaction time of 40 h. Finally, the molar ratio of guaiacol to glyoxylic acid of 1.3:1 was determined to be the optimal reaction condition.

### **3. The influence of reaction time for the reaction**

In order to ensure the maximization of guaiacol conversion and minimize the production of by-product, the effect of reaction time on product selectivity was studied at room temperature, pH=11.5, and the molar ratio of guaiacol to glyoxylic acid was 1.3:1. The results showed that 20-26 h was the most favorable for the reaction time.

### **4. The influence of reaction temperature for the reaction**

For the effect of different temperatures on product selectivity, at pH=11.5, the molar ratio of guaiacol to glyoxylic acid was 1.3:1, and the reaction time of 24 h. It was found that too high temperature was not conducive to the improvement of VMA selectivity, so the optimal reaction temperature was determined at 20 °C.

**Figure S1.** The effect of pH value for guaiacol conversion.

**Figure S2.** The effect of material mole ratio for guaiacol conversion.

**Figure S3.** The effect of reaction time for guaiacol conversion.

**Figure S4.** The effect of reaction temperature for guaiacol conversion.

**Figure S5.** Comparison of catalytic effect of  $\text{Al}^{3+}$  under different recycle times.

**Figure S6.** The effect of  $\text{Al}(\text{NO}_3)_3$  and  $\text{AlCl}_3$  for the selectivity of target products.

**Figure S7.** The effect of reaction temperature for the selectivity of target products with the present of  $\text{Al}^{3+}$ .

**Figure S8.** The effect of adding  $\text{Al}^{3+}$  on the condensation reaction of guaiacol with formaldehyde.

**Figure S9.** The effect of adding  $\text{Zn}^{2+}$  on product selectivity.

**Figure S10.** (a) The *in-situ* FT-IR spectra of ZnGO, (b) Coordination mode of  $\text{Zn}^{2+}$  with guaiacol.

**Figure S11.** The changes of glyoxylic acid conversion following time.

**Figure S1.**

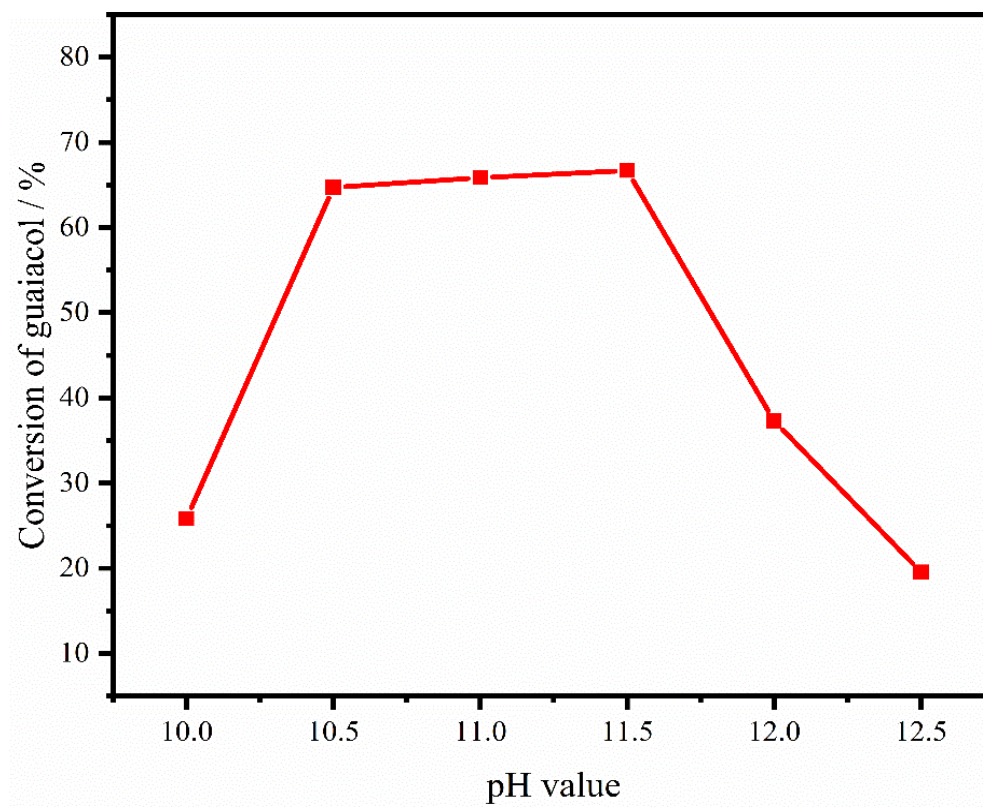

**Figure S2.**

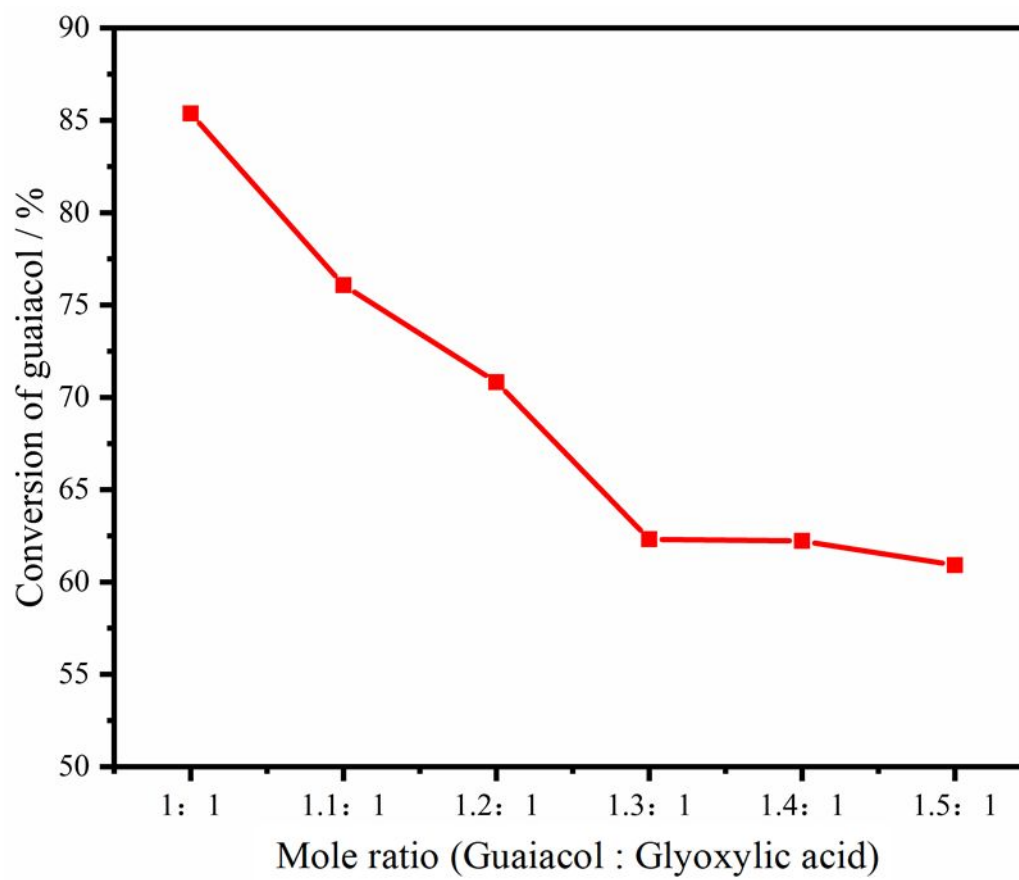

**Figure S3.**

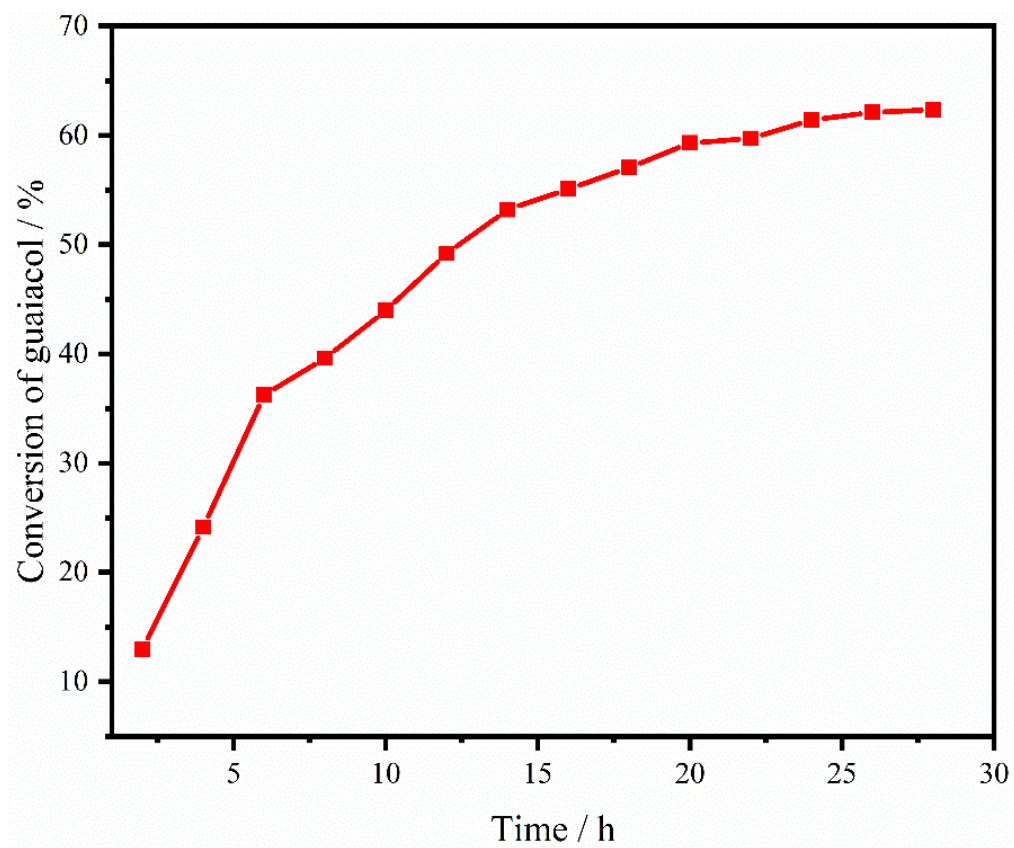



**Figure S4.**

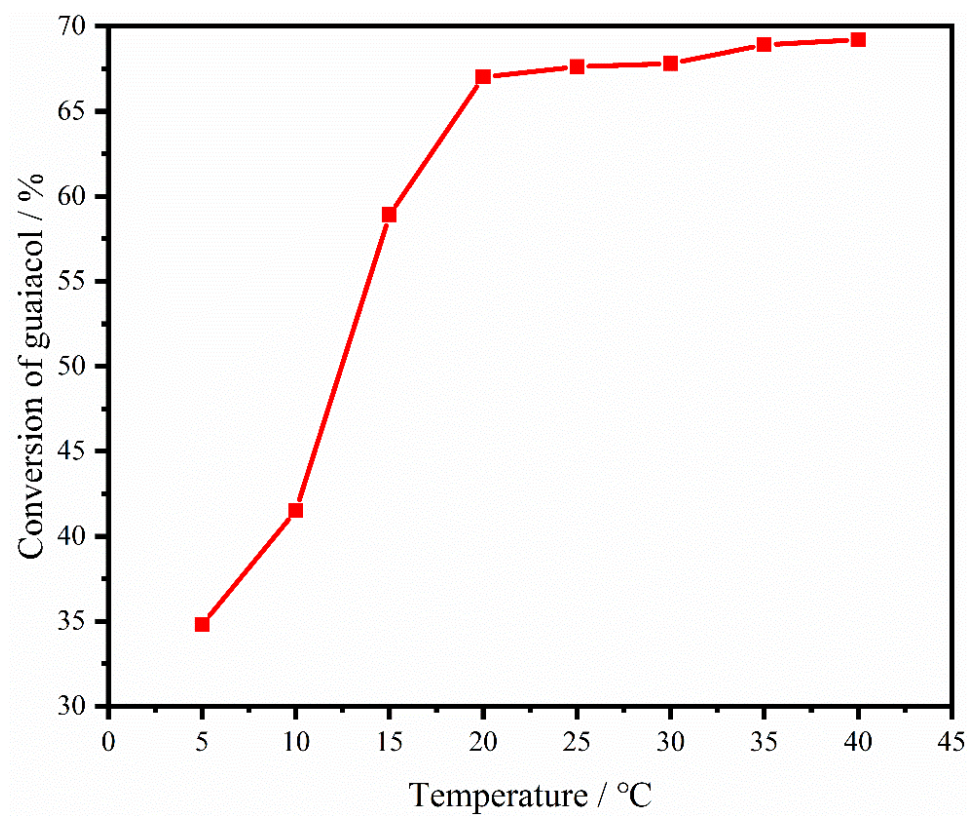

**Figure S5.**

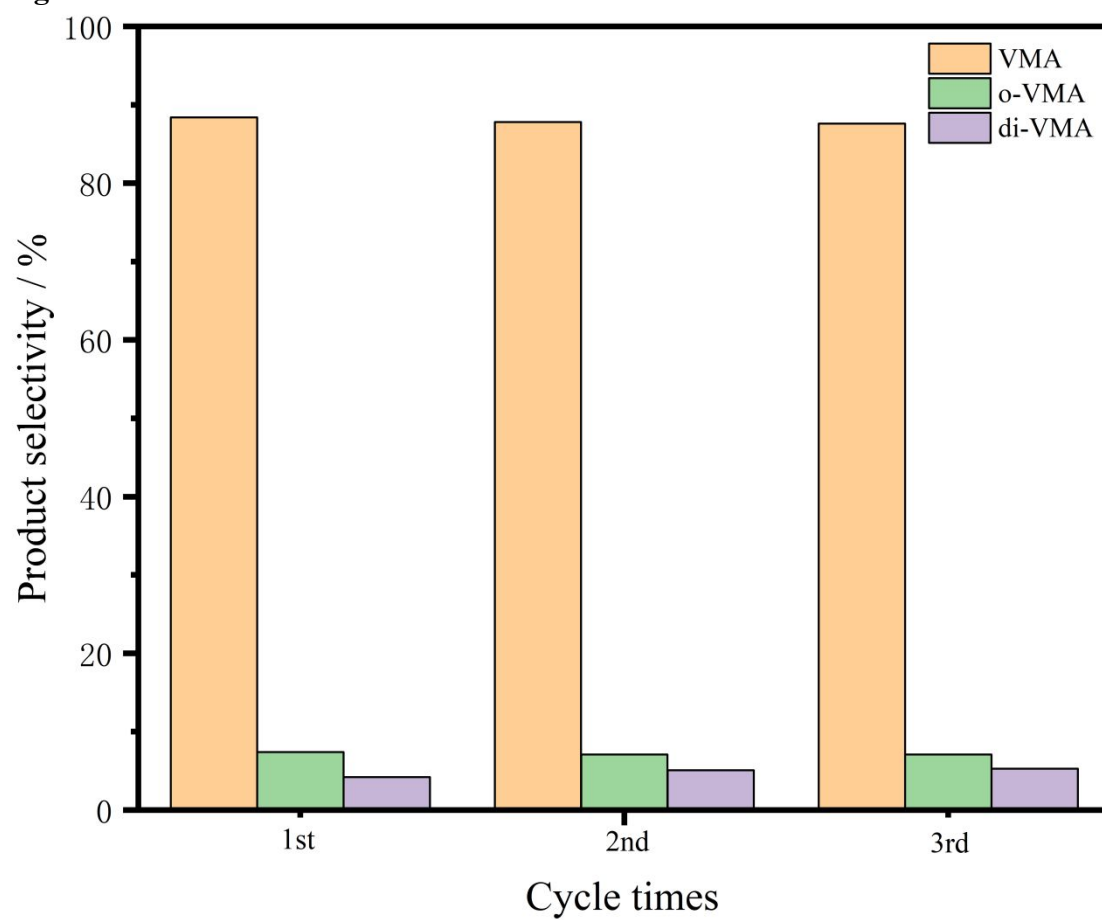

**Figure S6.**

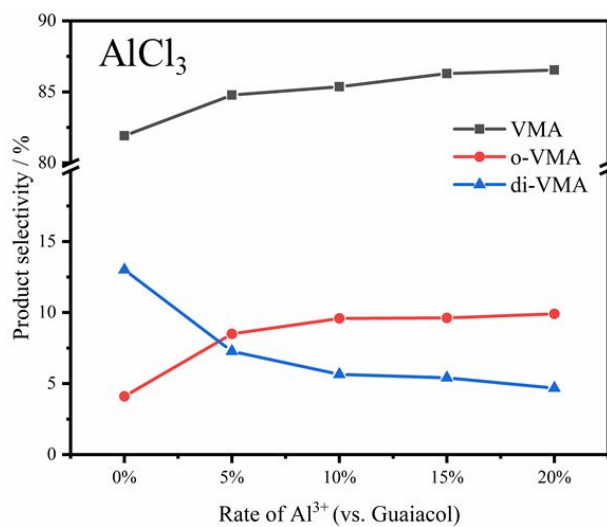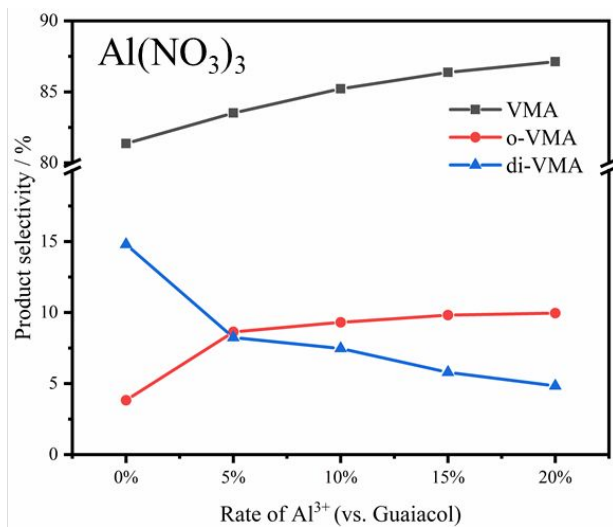

**Figure S7.**

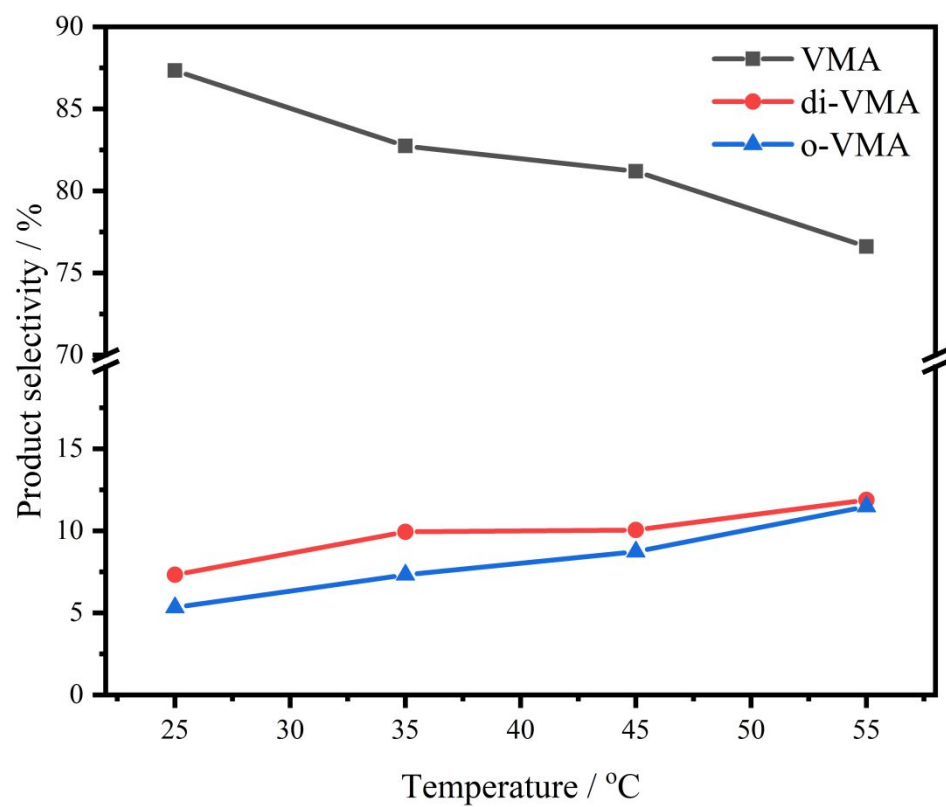

Figure S8.

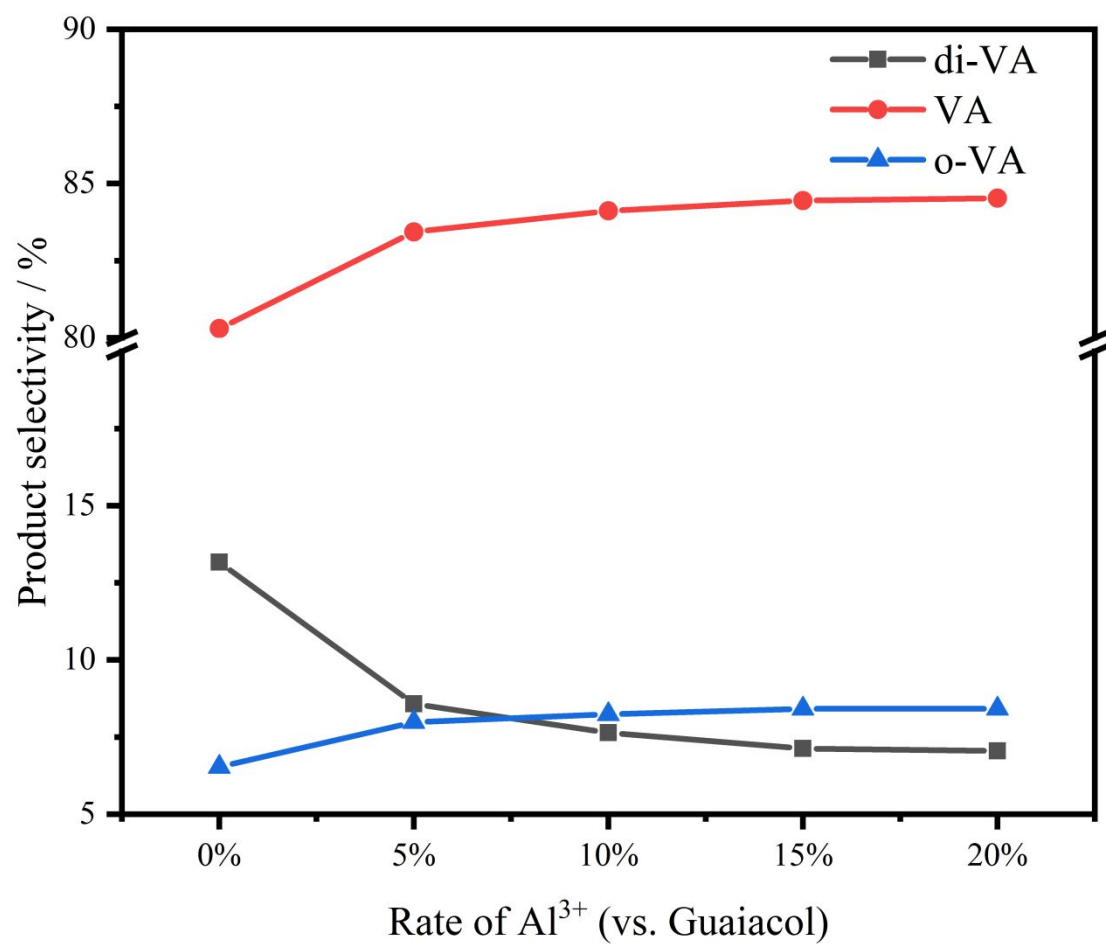

Figure S9.

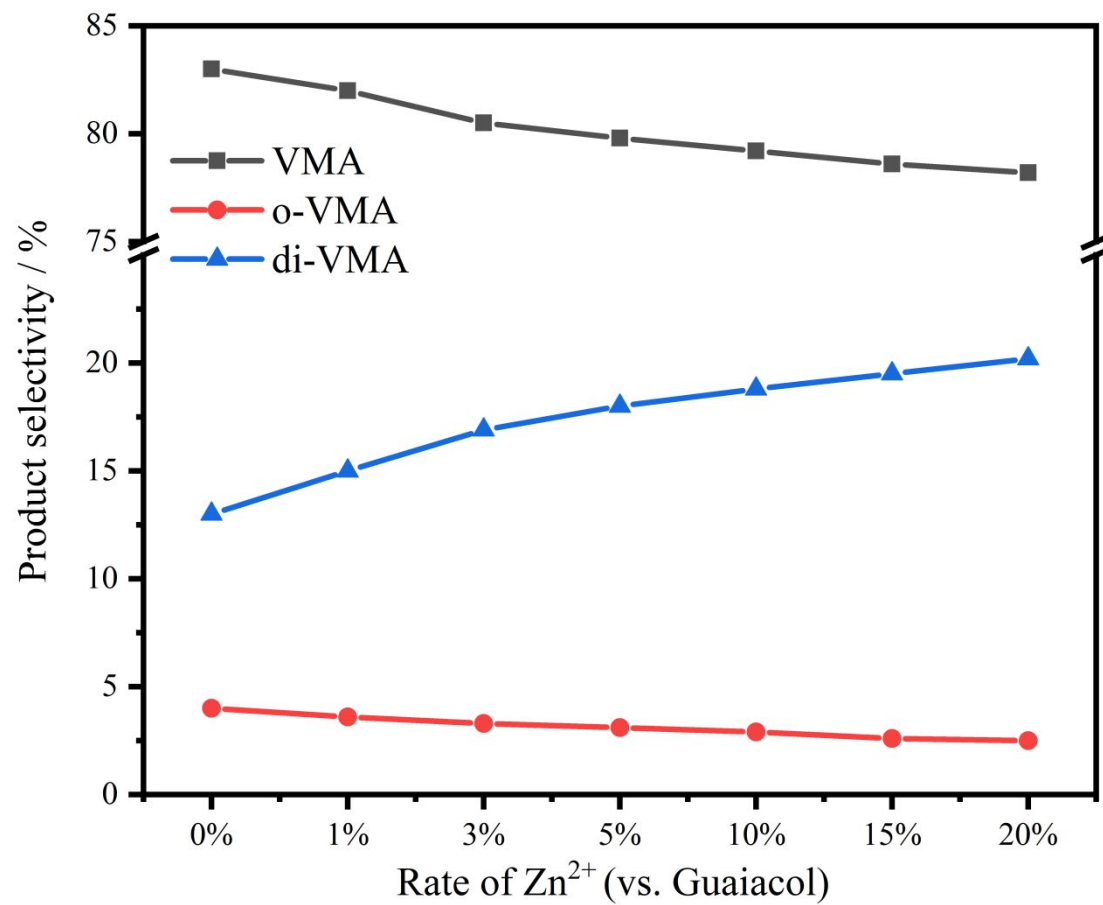

**Figure S10.**

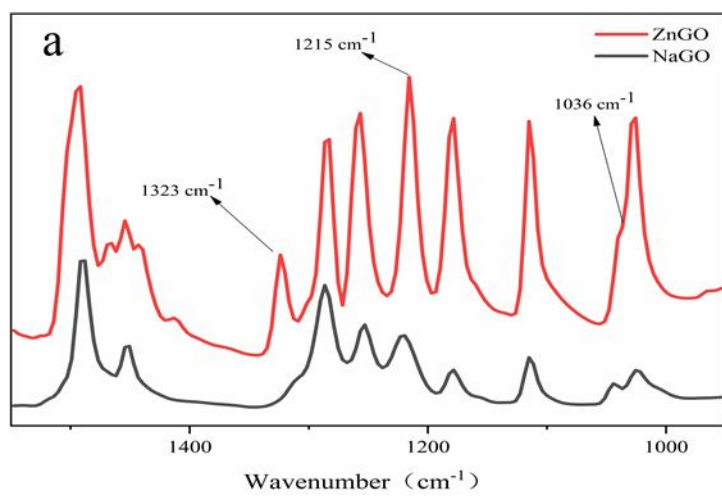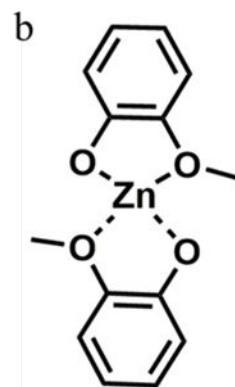

Figure S11.

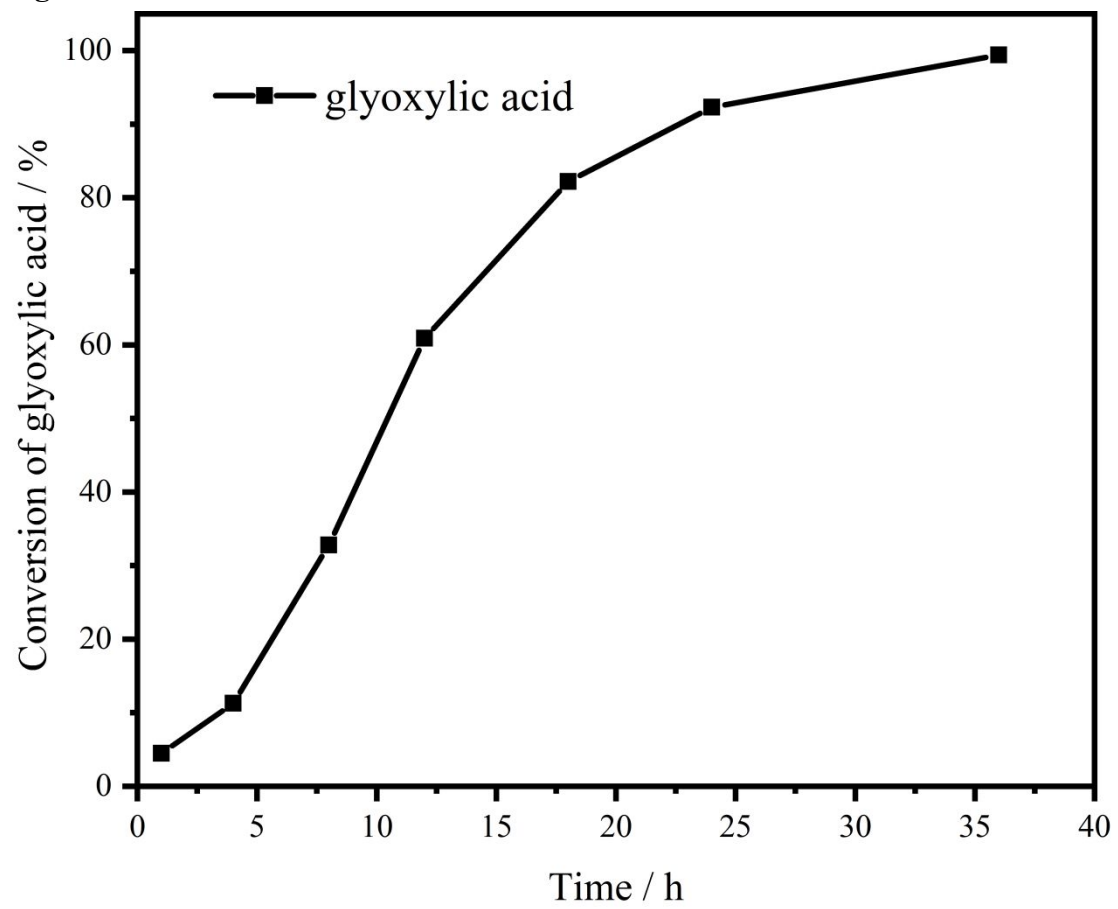

Supplement: Supplementary file 1 [file 24711632]
